# Supplementary material for: Acridinium-based photoredox nanocatalysts for site-selective arene C–H amination in water
Source: Royal Society of Chemistry journal article supplement (doi:10.1039/d5nj02002f), 2026-01-01
Supplement: d5nj02002f1.pdf [file d5nj02002f1.pdf]

## ***Supporting Information***

### **Acridinium-Based Photoredox Nanocatalysts for Site-Selective Arene C–H Amination in Water**

Qi Liu,<sup>†</sup> Tianyou Chen,<sup>†\*</sup> Xiaorong Xiong,<sup>†</sup> Yizhuo Lu,<sup>†</sup> Wen Fan,<sup>†</sup> Zushun Xu<sup>†\*\*</sup>

<sup>†</sup> Ministry of Education Key Laboratory for the Green Preparation and Application of Functional Materials, Hubei Key Laboratory of Polymer Materials, School of Materials Science and Engineering, Hubei University, Wuhan 430062, China

\* E-mail: tianyou.chen@hubu.edu.cn

\*\* E-mail: zushunxu@hubu.edu.cn

## Table of Contents

|                                                                              |    |
|------------------------------------------------------------------------------|----|
| 1. $^1\text{H}$ NMR spectra .....                                            | 3  |
| 2. FT-IR spectra .....                                                       | 5  |
| 3. GPC trace of PMATE .....                                                  | 6  |
| 4. EPR measurements .....                                                    | 7  |
| 5. Feed amount of the preparation of nanocatalysts .....                     | 8  |
| 6. TEM images and size distributions .....                                   | 9  |
| 7. Estimation of the reaction order with respect to pyrazole .....           | 10 |
| 8. Typical $^1\text{H}$ NMR data of site-selective arene C–H amination ..... | 12 |
| 9. Yields of site-selective arene C–H amination .....                        | 16 |
| 10. Stability of acridinium-based photoredox nanocatalysts .....             | 17 |
| 11. References .....                                                         | 18 |

## 1. $^1\text{H}$ NMR spectra

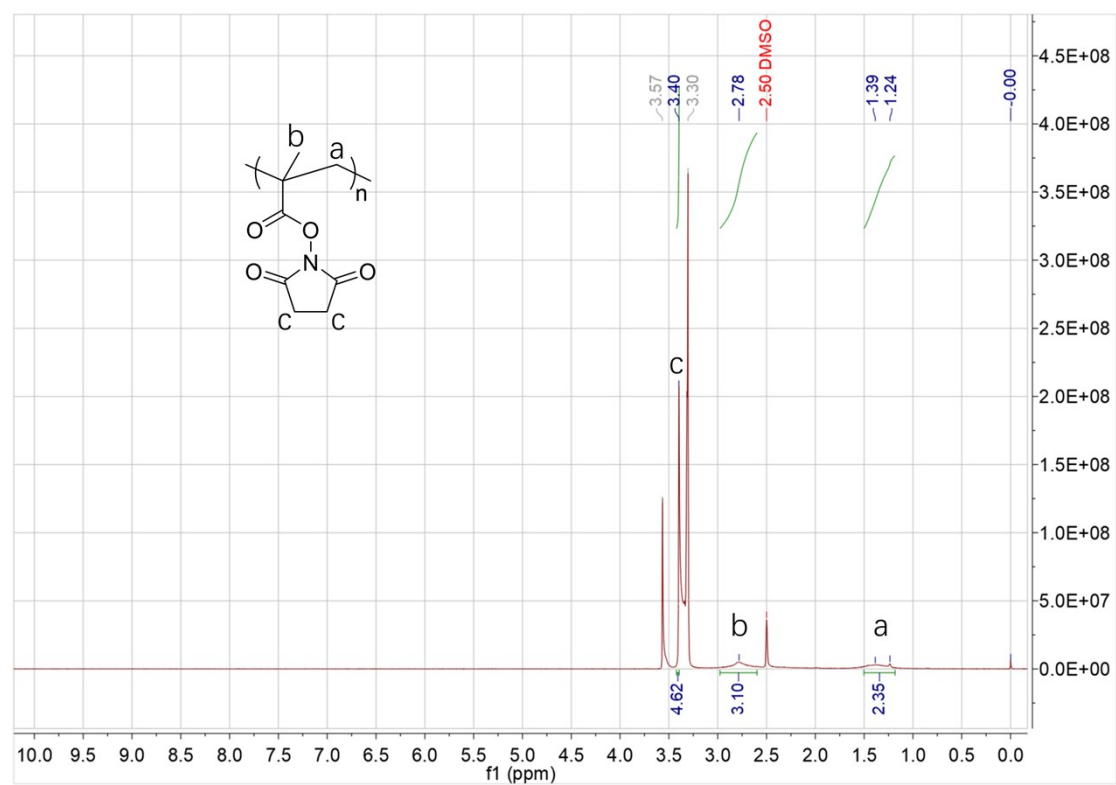

**Figure S1.**  $^1\text{H}$  NMR spectrum in  $\text{DMSO-d}_6$  of PNHSMA. The signals at 3.30 ppm and 3.57 ppm arise from water and 1,4-dioxane, respectively.

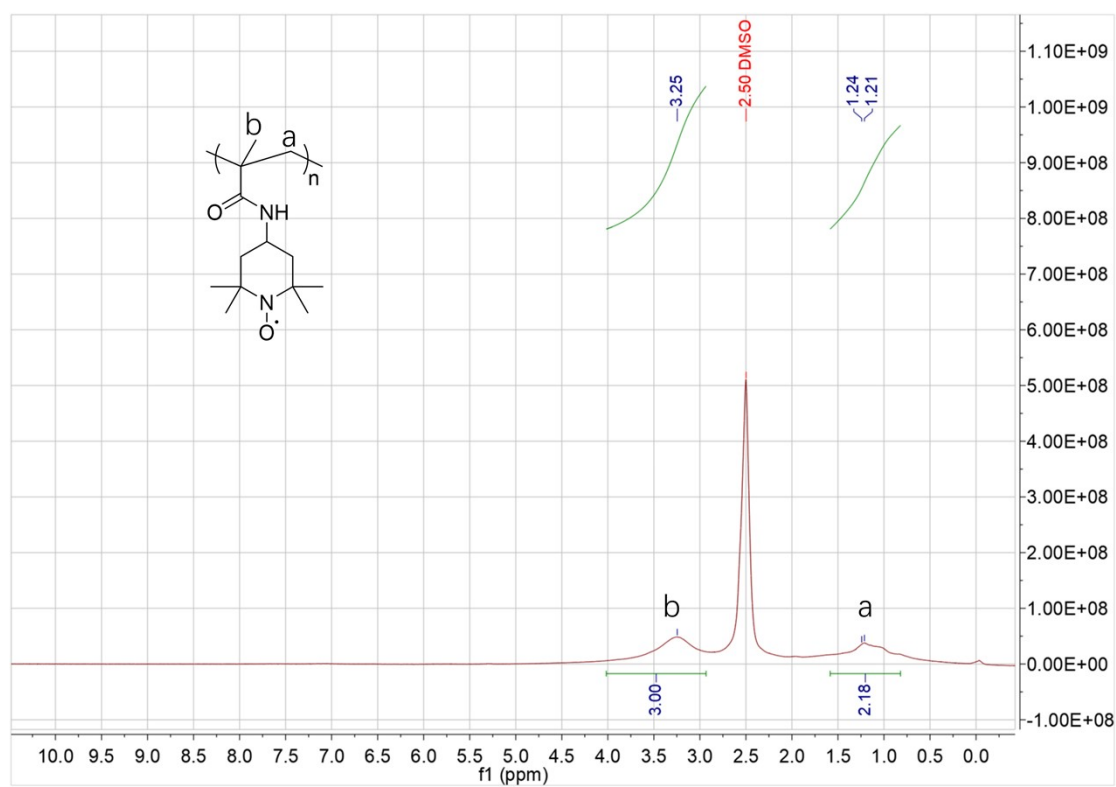

**Figure S2.**  $^1\text{H}$  NMR spectrum in  $\text{DMSO-d}_6$  of PMATE.

## 2. FT-IR spectra

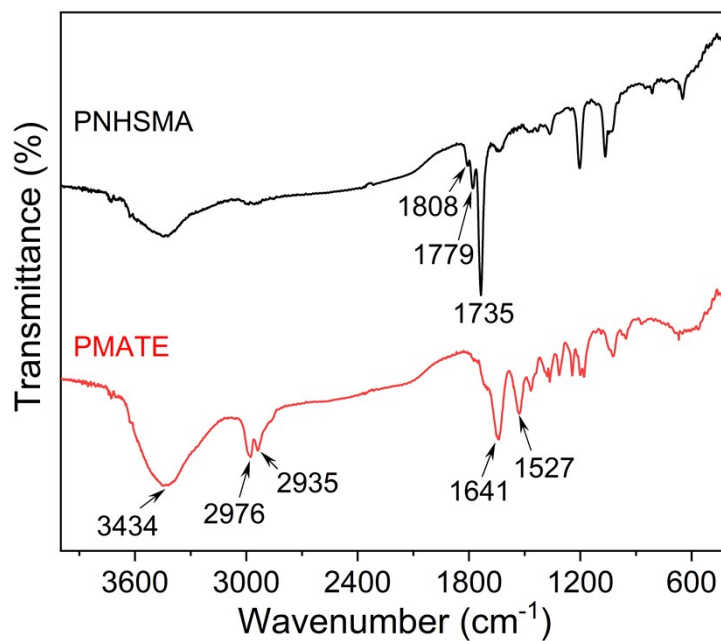

**Figure S3.** FT-IR spectra of PNHSMA and PMATE.

In the FT-IR spectrum of PNHSMA, three characteristic bands of carbonyl groups (i.e. the split ester carbonyl bands at 1808 and 1779  $\text{cm}^{-1}$  and the succinimide carbonyl band at 1735  $\text{cm}^{-1}$ ) were observed at 1808, 1779, and 1735  $\text{cm}^{-1}$ .<sup>1-4</sup> In the FT-IR spectrum of PMATE, the characteristic bands of N-H group was observed at 3434  $\text{cm}^{-1}$ ; the absorption bands at 2976 and 2935  $\text{cm}^{-1}$  were ascribed to C-H vibrations; the characteristic bands of amide groups were observed at 1641 (amide I) and 1527 (amide II)  $\text{cm}^{-1}$ .

### 3. GPC trace of PMATE

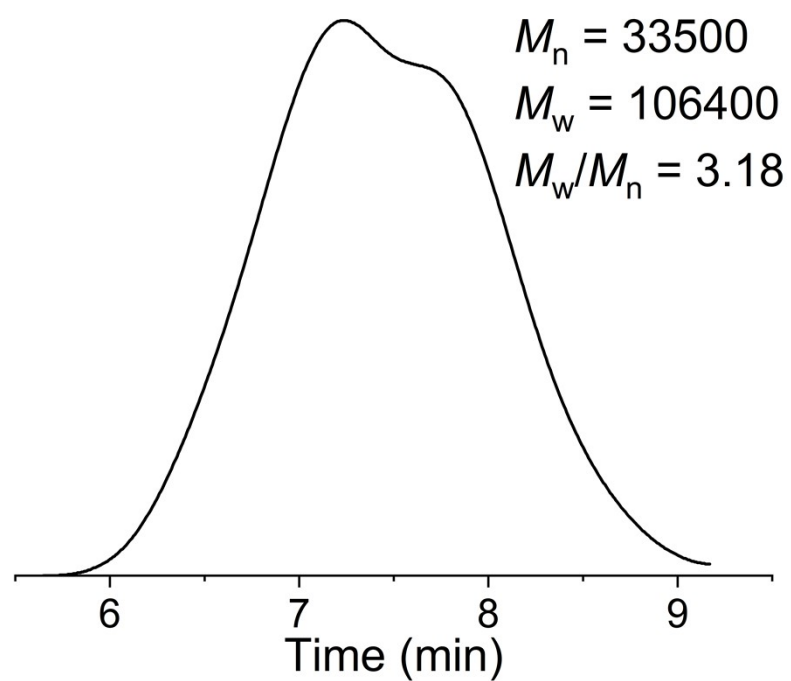

**Figure S4.** The GPC trace of PMATE.

#### 4. EPR measurements

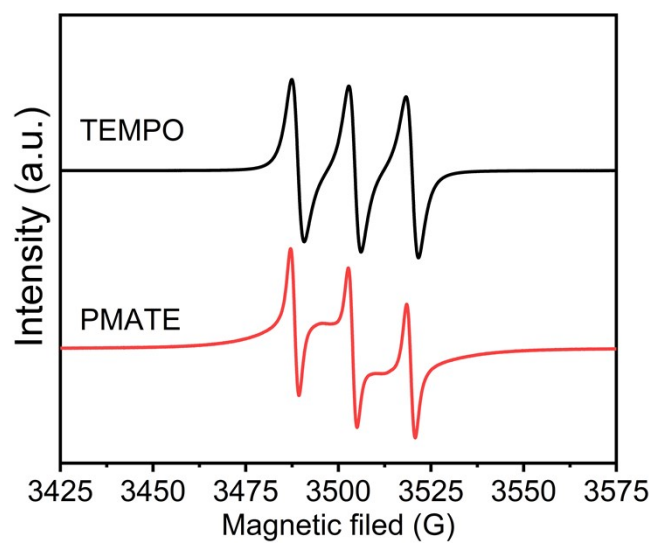

**Figure S5.** EPR measurements of TEMPO and PMATE in DMF (1.0 mg/mL) at room temperature.

## 5. Feed amount of the preparation of nanocatalysts

**Table S1.** Feed amount of the preparation of nanocatalysts through nanoprecipitation in water <sup>a</sup>.

| Nanocatalysts             | Mes-Acr / mg | TEMPO / mg | PMATE / mg |
|---------------------------|--------------|------------|------------|
| Mes-Acr/TEMPO (5/10 mol%) | 7            | 4          | /          |
| Mes-Acr/TEMPO (5/20 mol%) | 7            | 8          | /          |
| Mes-Acr/TEMPO (5/40 mol%) | 7            | 16         | /          |
| Mes-Acr/TEMPO (5/60 mol%) | 7            | 24         | /          |
| Mes-Acr/PMATE (5/10 mol%) | 7            | /          | 6          |
| Mes-Acr/PMATE (5/20 mol%) | 7            | /          | 12         |
| Mes-Acr/PMATE (5/40 mol%) | 7            | /          | 24         |
| Mes-Acr/PMATE (5/60 mol%) | 7            | /          | 36         |

<sup>a</sup> A solution of catalytic component in DMSO (0.5 mL) was added rapidly (<3 s) to de-ionized water (5.0 mL) at room temperature under stirring (500 r/min) to obtain the nanocatalyst.



## 6. TEM images and size distributions

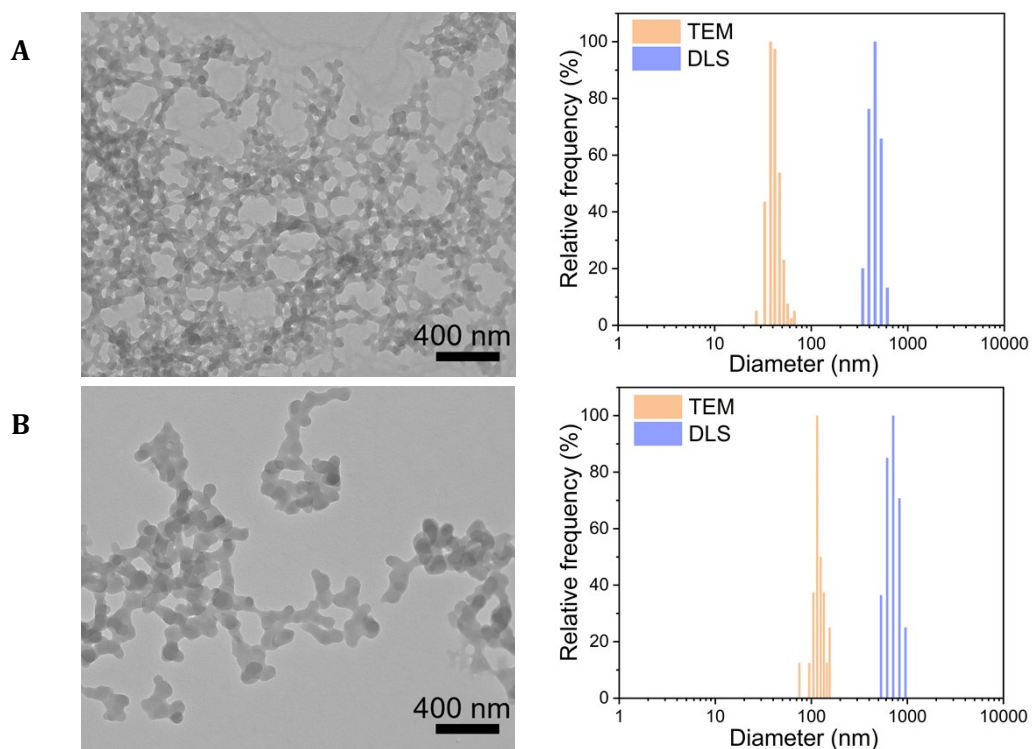

**Figure S6.** TEM images and size distributions determined by TEM and DLS of the (A) Mes-Acr/PMATE (5/10 mol%) and (B) Mes-Acr/PMATE (5/40 mol%) catalytic systems.

**Table S2.** Average diameters of nanocatalysts determined by TEM and DLS.

| Nanocatalysts             | $D_{\text{TEM}} / \text{nm}$ | $D_{\text{DLS}} / \text{nm}$                  | PDI <sup>a</sup> |
|---------------------------|------------------------------|-----------------------------------------------|------------------|
| Mes-Acr/TEMPO (5/20 mol%) | $216 \pm 126$                | $82 \pm 30$ (major)<br>$4420 \pm 920$ (minor) | 0.176            |
| Mes-Acr/PMATE (5/10 mol%) | $55 \pm 27$                  | $422 \pm 71$                                  | 0.028            |
| Mes-Acr/PMATE (5/20 mol%) | $42 \pm 26$                  | $458 \pm 67$                                  | 0.021            |
| Mes-Acr/PMATE (5/40 mol%) | $120 \pm 46$                 | $710 \pm 118$                                 | 0.027            |

<sup>a</sup> Determined by DLS.

## 7. Estimation of the reaction order with respect to pyrazole

The reaction rate of products  $r_{\text{product}}$  can be determined by the following equation:

$$r_{\text{product}} = k c_{\text{anisole}}^{\alpha} c_{\text{pyrazole}}^{\beta} c_{\text{oxygen}}^{\gamma} \quad (1)$$

Where  $k$  is the rate constant;  $c_{\text{anisole}}$ ,  $c_{\text{pyrazole}}$ , and  $c_{\text{oxygen}}$  are the concentrations of anisole, pyrazole, and oxygen, respectively.  $\alpha$ ,  $\beta$ , and  $\gamma$  are the orders with respect to anisole, pyrazole, and oxygen, respectively.

$$\log r_{\text{product}} = \log k + \alpha \log c_{\text{anisole}} + \beta \log c_{\text{pyrazole}} + \gamma \log c_{\text{oxygen}} \quad (2)$$

Due to the low yield (<10%) of products, the concentration of anisole  $c_{\text{anisole}}$  can be considered as a constant. The concentration of oxygen  $c_{\text{oxygen}}$  is a constant due to the exposure of the solution to open air. As such, the equation (2) can be simplified as the following equation:

$$\log r_{\text{product}} = \log k_c + \beta \log c_{\text{pyrazole}} \quad (3)$$

Where  $k_c$  is a constant. And the equation can be used for the determination the value of  $\beta$  by linear fitting of  $\log r_{\text{product}}$  vs  $\log c_{\text{pyrazole}}$ .

The reaction rate  $r_{\text{product}}$  can be calculated according to the following equation:

$$r_{\text{product}} = \frac{c_{\text{pyrazole}} (y_{\text{Ortho}} + y_{\text{Para}})}{t} \quad (4)$$

Where  $y_{\text{Ortho}}$  and  $y_{\text{Para}}$  are the yields of ortho and para products;  $t$  is the reaction time.

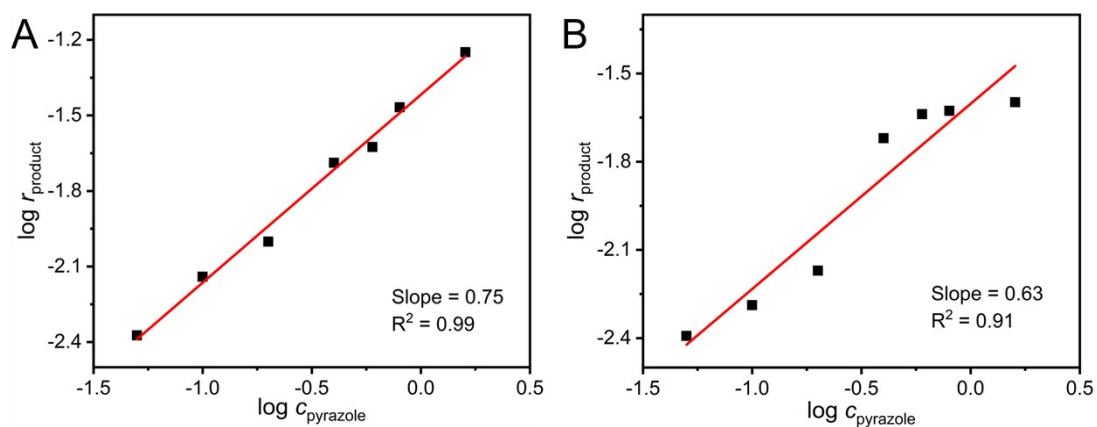

**Figure S7.** The fitting curves of  $\log r_{\text{product}}$  vs  $\log c_{\text{pyrazole}}$  in the case of (A) Mes-Acr/TEMPO and (B) Mes-Acr/PMATE as the catalytic systems. The reaction is 0.75 and 0.63 order in pyrazole when Mes-Acr/TEMPO and Mes-Acr/PMATE are used as the catalysts, respectively.

## 8. Typical $^1\text{H}$ NMR data of site-selective arene C–H amination

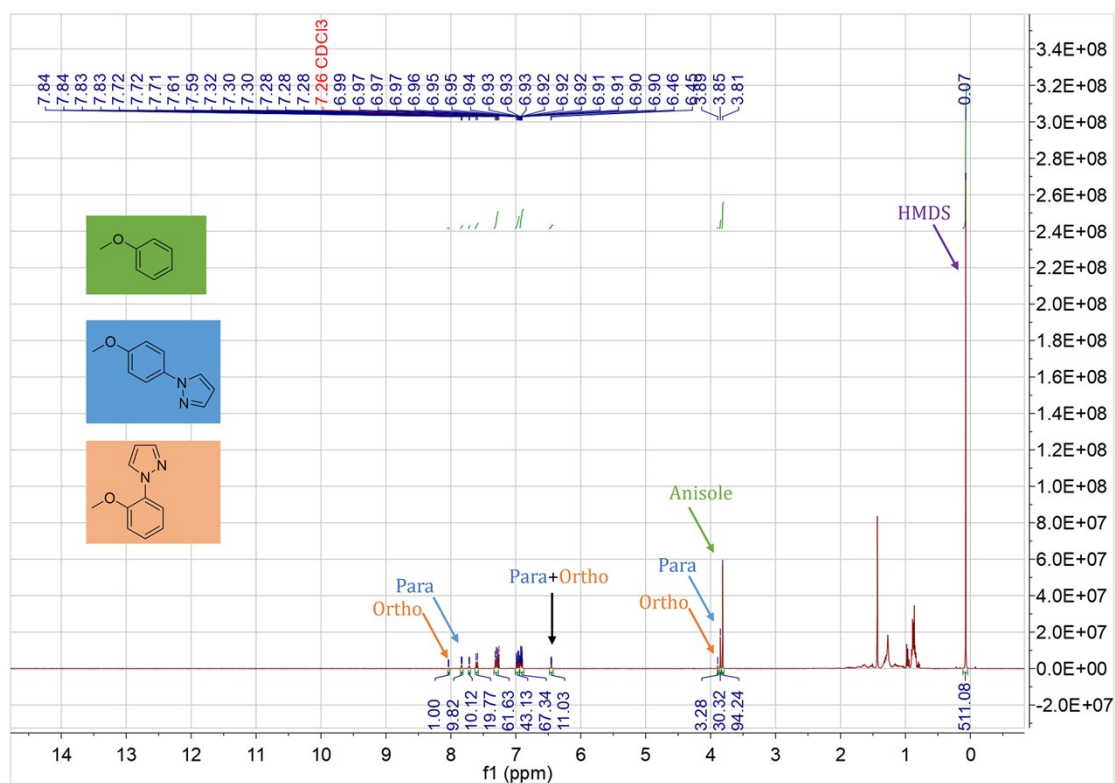

**Figure S8.**  $^1\text{H}$  NMR spectrum in  $\text{CDCl}_3$  of the extracted mixture of site-selective arene C–H amination of anisole with pyrazole over Mes-Acr/PMATE (5/20 mol%). HMDS was added as the internal standard. The yields of para and ortho products were 3.46% and 0.35%, respectively.

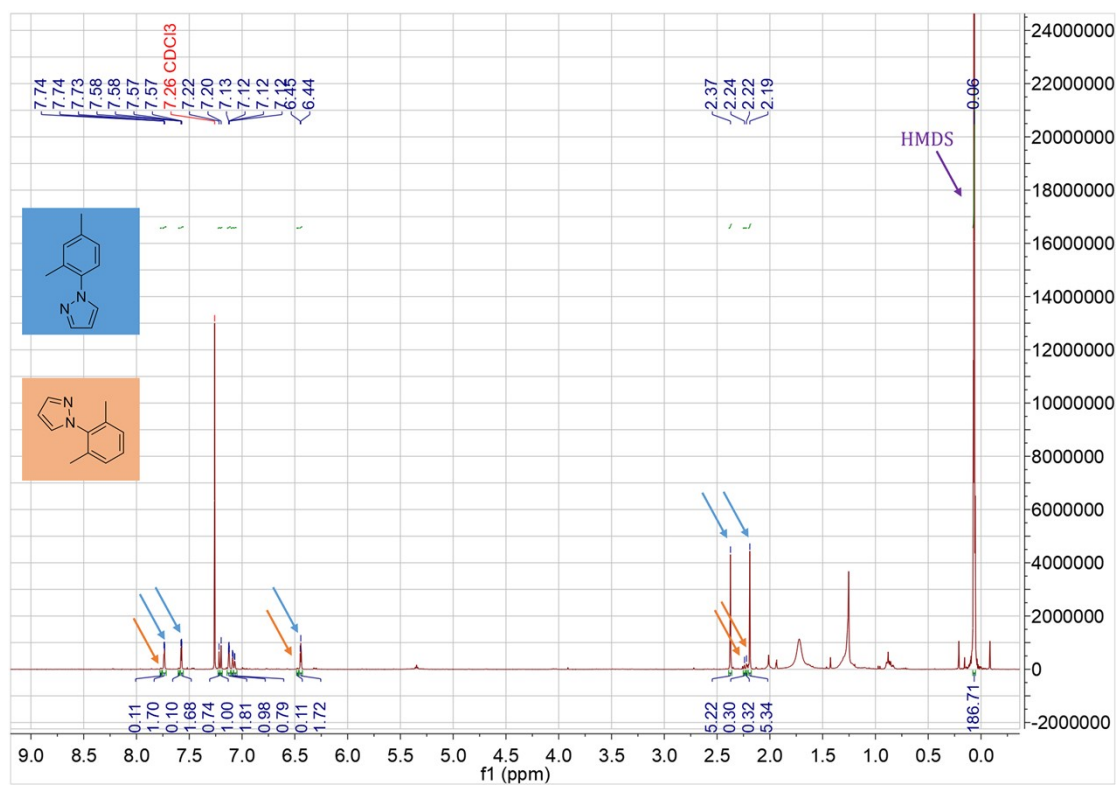

**Figure S9.**  $^1\text{H}$  NMR spectrum in  $\text{CDCl}_3$  of the extracted mixture of site-selective arene C-H amination of m-xylene with pyrazole over Mes-Acr/PMATE (5/20 mol%). HMDS was added as the internal standard. The yields of para and ortho products were 1.64% and 0.11%, respectively.

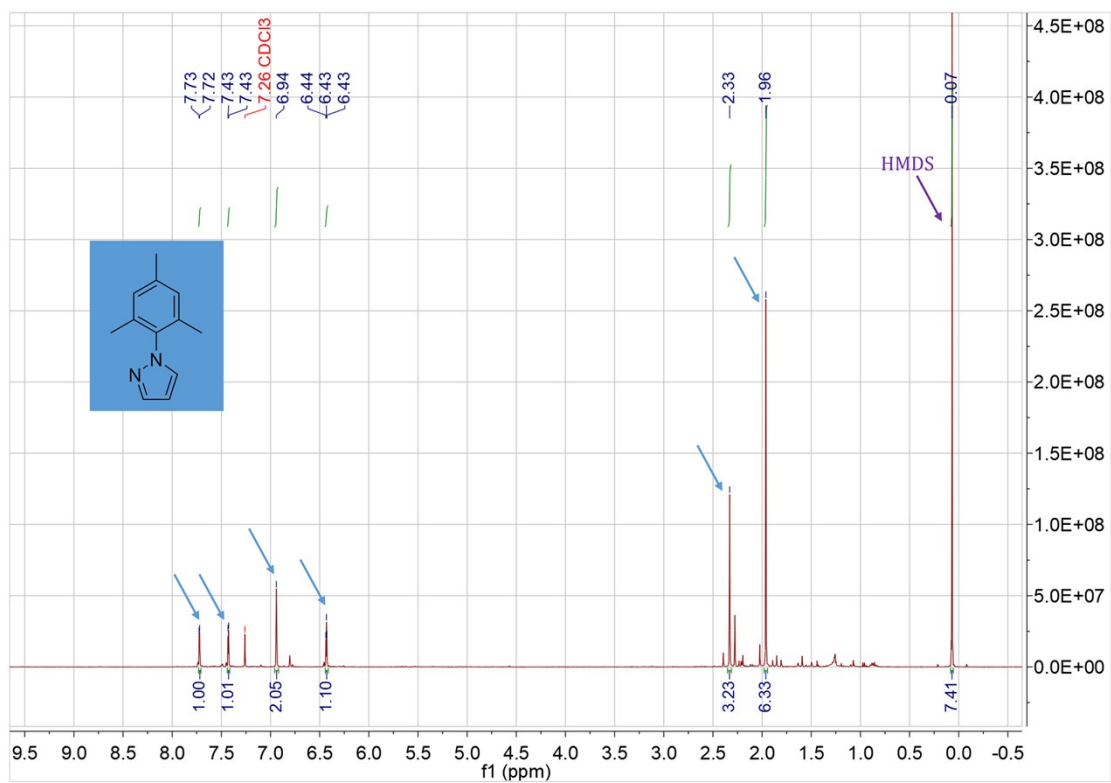

**Figure S10.**  $^1\text{H}$  NMR spectrum in  $\text{CDCl}_3$  of the extracted mixture of site-selective arene C-H amination of mesitylene with pyrazole over Mes-Acr/PMATE (5/20 mol%). HMDS was added as the internal standard. The yield of the product was 24.29%.

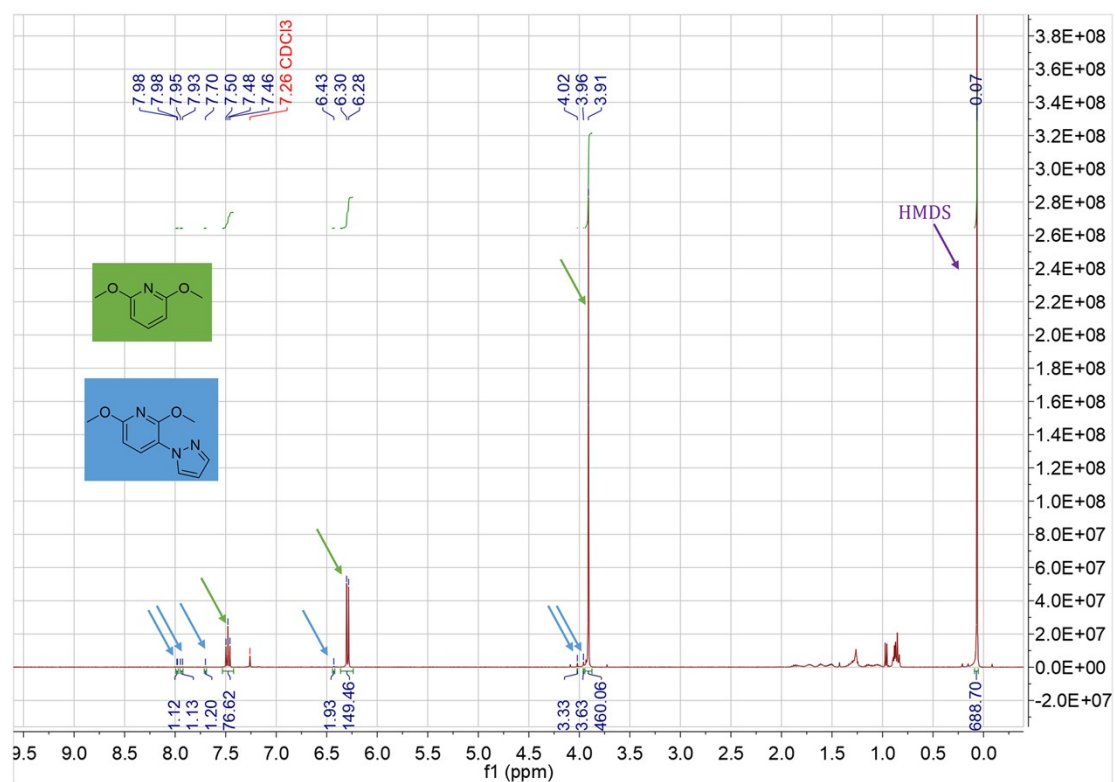

**Figure S11.** <sup>1</sup>H NMR spectrum in CDCl<sub>3</sub> of the extracted mixture of site-selective arene C–H amination of 2,6-dimethoxypyridine with pyrazole over Mes-Acr/PMATE (5/20 mol%). HMDS was added as the internal standard. The yield of the product was 0.29%.

## 9. Yields of site-selective arene C–H amination

**Table S3.** Yields of site-selective arene C–H amination of anisole with pyrazole over various nanocatalysts <sup>a</sup>.

| Nanocatalysts             | Yield of the ortho product / % | Yield of the para product / % |
|---------------------------|--------------------------------|-------------------------------|
| Mes-Acr/TEMPO (5/10 mol%) | 0.71                           | 5.87                          |
| Mes-Acr/TEMPO (5/20 mol%) | 0.41                           | 3.69                          |
| Mes-Acr&TEMPO (5/20 mol%) | 0.31                           | 2.75                          |
| Mes-Acr/TEMPO (5/40 mol%) | 0.15                           | 1.32                          |
| Mes-Acr/TEMPO (5/60 mol%) | 0.04                           | 0.40                          |
| Mes-Acr/PMATE (5/10 mol%) | 0.56                           | 5.53                          |
| Mes-Acr/PMATE (5/20 mol%) | 0.35                           | 3.46                          |
| Mes-Acr&PMATE (5/20 mol%) | 0.12                           | 0.99                          |
| Mes-Acr/PMATE (5/40 mol%) | 0.06                           | 0.48                          |
| Mes-Acr/PMATE (5/60 mol%) | 0.02                           | 0.18                          |

<sup>a</sup> Determined by <sup>1</sup>H NMR.



## 10. Stability of acridinium-based photoredox nanocatalysts

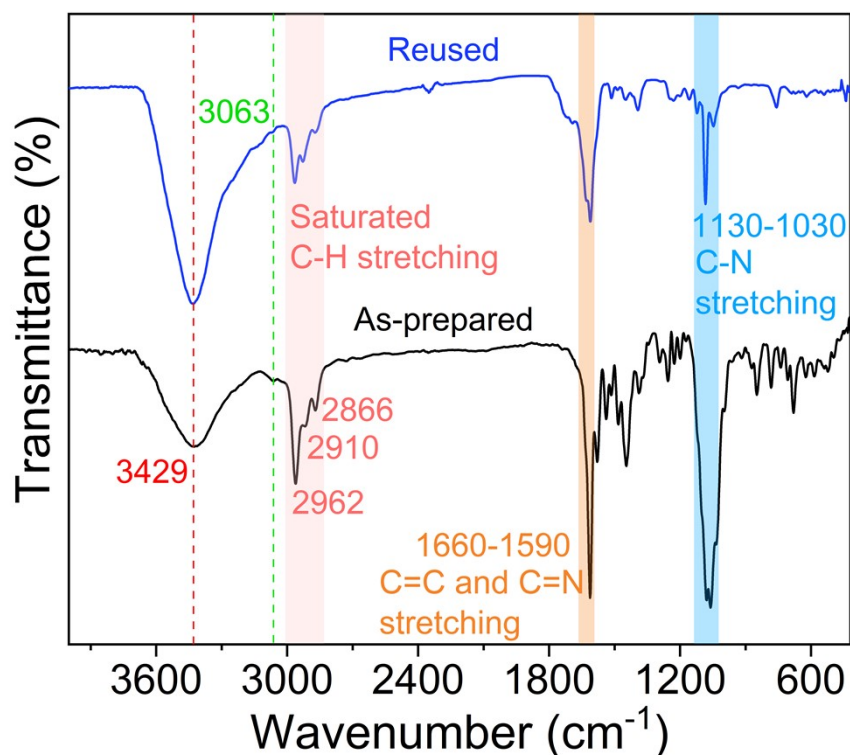

**Figure S12.** FT-IR spectra of the as-prepared and reused Mes-Acr/TEMPO (5/20 mol%) nanocatalysts.

The absorption band at  $3429\text{ cm}^{-1}$  was ascribed to O–H vibration of water; the characteristic band of aromatic C–H groups was observed at  $3063\text{ cm}^{-1}$ . The absorption bands at 2962, 2910, and  $2866\text{ cm}^{-1}$  were ascribed to saturated C–H vibrations. The characteristic bands of C=C and C=N groups were observed at  $1660\text{--}1590\text{ cm}^{-1}$ ; the characteristic bands of C–N groups were observed at  $1130\text{--}1030\text{ cm}^{-1}$ . The significant changes in shape and intensity of the characteristic bands of C=C and C=N groups and C–N groups after reuse suggest the degradation of Mes-Acr.

## 11. References

1. Feng, C. L.; Zhang, Z.; Förch, R.; Knoll, W.; Vancso, G. J.; Schönherr, H., Reactive Thin Polymer Films as Platforms for the Immobilization of Biomolecules. *Biomacromolecules* **2005**, *6* (6), 3243-3251.
2. Feng, C. L.; Vancso, G. J.; Schönherr, H., Fabrication of Robust Biomolecular Patterns by Reactive Microcontact Printing on N-Hydroxysuccinimide Ester-Containing Polymer Films. *Adv. Funct. Mater.* **2006**, *16* (10), 1306-1312.
3. Schönherr, H.; Feng, C.; Shovsky, A., Interfacial Reactions in Confinement: Kinetics and Temperature Dependence of Reactions in Self-Assembled Monolayers Compared to Ultrathin Polymer Films. *Langmuir* **2003**, *19* (26), 10843-10851.
4. Rathfon, J. M.; Tew, G. N., Synthesis of thermoresponsive poly(N-isopropylmethacrylamide) and poly(acrylic acid) block copolymers via post-functionalization of poly(N-methacryloxysuccinimide). *Polymer* **2008**, *49* (7), 1761-1769.
